# Supplementary material
Source: publisher figshare collection journal article supplement (https://gsajournals.figshare.com/ndownloader/files/24136109)
Supplement: Supplementary file 1 [file 24136109]

## Sheet: Table S4
Table S5. Enhancement of Pro penetrance in rrf-1(pk1417); glp-1(ar202) animals for the 15 genes whose normal function is required for robust distal progenitor pool expansion.
Gene	WormBase ID	Pro%	Pro% in control	Enhancement of Pro penetrance	P value
rpl-2	WBGene00004413	9.375	4.65116	4.72384	0.6453	ns
mrpl-4	WBGene00020717	15.2174	10.2041	5.01331	0.5449	ns
snr-3	WBGene00004916	17.0213	10.2041	6.81719	0.3822	ns
F53F4.11	WBGene00009993	32.5	10.2041	22.2959	0.0155	*
T13H5.4	WBGene00011758	22.9167	10.2041	12.7126	0.1076	ns
Y45F10D.7	WBGene00012887	27.907	10.2041	17.7029	0.0344	*
rpl-25.1	WBGene00004438	12.5	10.2041	2.29592	0.7593	ns
mrpl-28	WBGene00020796	11.6279	10.2041	1.42383	1	ns
rrbs-1	WBGene00007617	40	10.2041	29.7959	0.0021	**
iff-2	WBGene00002065	23.4043	10.2041	13.2002	0.1039	ns
cct-7	WBGene00020391	26.8293	10.2041	16.6252	0.0535	ns
prp-31	WBGene00022458	23.8095	10.2041	13.6054	0.096	ns
eif-3.F	WBGene00001229	31.1111	10.2041	20.907	0.0193	*
W09C5.1	WBGene00012351	55.8824	6.25	49.6324	< 0.0001	****
ZK430.7	WBGene00022742	29.7872	10.2041	19.5832	0.0211	*
*, P<0.05; **, P<0.01; ****, P<0.0001 for Fisher’s Exact test.
